# Supplementary material
Source: publisher site journal article supplement (https://www.dovepress.com/article/508747)
Supplement: Supplementary file 1 [file get_supplementary_file.php]

# Supplementary Materials

**Content**

Supplementary table 1: Regions of interest (ROI) in the AAL template……………………..…….2

Supplementary table 2: Demographic, clinical and cognitive characteristics of the participants………………………………….……………………….……………………….…………6

Supplementary table 3: Alterations in global functional network metrics are observed in persons with ANI………………………………………………………………………………………………….7

Supplementary table 4: Altered node attributes were observed in the functional brain networks of persons with ANI……………………………………………………………………….....…………8

Supplementary figure 1: Structural network global properties remain stable in persons with ANI…...……………………………………………………………………………………..………….10

Supplementary table 5: Structural network global properties remain stable in persons with ANI…………...…………………………………………………………………………………..…….11

Supplementary figure 2: Disrupted structural connectivity and functional connectivity network coupling…………………………………………………………………………..……………..……..12

Supplementary table 6: Classification performance of single-indicator and combined models…………………………………………………………………………………………..……..13

**Table S1**

Regions of interest (ROI) in the AAL template

| Region name | Abbreviation |
| --- | --- |
| Precental gyrus | PreCG |
| Superior frontal gyrus (dorsolateral) | SFGdor |
| Superior frontal gyrus (orbital part) | ORBsup |
| Middle frontal gyrus | MFG |
| Middle frontal gyrus (orbital part) | ORBmid |
| Inferior frontal gyrus (opercular part) | IFGoperc |
| Inferior frontal gyrus (triangular part) | IFGtriang |
| Inferior frontal gyrus (orbital part) | ORBinf |
| Rolandic operculum | ROL |
| Supplementary motor area | SMA |
| Olfactroy cortex | OLF |
| Superior frontal gyrus (medial) | SFGmed |
| Superior frontal gyrus (medial orbital) | ORBsupmed |
| Gyrus rectus | REC |
| Insula | INS |
| Anterior cingulate and paracingulate gyri | ACG |
| Median cingulate and paracingulate gyri | MCG |
| Posterior cingulate gyrus | PCG |
| Hippocampus | HIP |
| Parahippocampal gyrus | PHG |
| Amygdala | AMYG |
| Calcarine fissure and surrounding cortex | CAL |
| Cuneus | CUN |
| Lingual gyrus | LING |
| Superior occipital gyrus | SOG |
| Middle occipital gyrus | MOG |
| Inferior occipital gyrus | IOG |
| Fusiform gyrus | FFG |
| Postcentral gyrus | PoCG |
| Superior parietal gyrus | SPG |
| Inferior parietal, but supramarginal and angular gyri | IPL |
| Supramarginal gyrus | SMG |
| Angular gyrus | ANG |
| Precuneus | PCUN |
| Paracentral lobule | PCL |
| Caudate nucleus | CAU |
| Lenticular nucleus (putamen) | PUT |
| Lenticular nucleus (pallidum) | PAL |
| Thalamus | THA |
| Heschl gyrus | HES |
| Superior temporal gyrus | STG |
| Temporal pole: superior temporal gyrus | TPOsup |
| Middle temporal gyrus | MTG |
| Temporal pole: middle temporal gyrus | TPOmid |
| Inferior temporal gyrus | ITG |
| Cerebelum_Crus1 | N/A |
| Cerebelum_Crus2 | N/A |
| Cerebelum_3 | N/A |
| Cerebelum_4_5 | N/A |
| Cerebelum_6 | N/A |
| Cerebelum_7b | N/A |
| Cerebelum_8 | N/A |
| Cerebelum_9 | N/A |
| Cerebelum_10 | N/A |
| Vermis_1_2 | N/A |
| Vermis_3 | N/A |
| Vermis_4_5 | N/A |
| Vermis_6 | N/A |
| Vermis_7 | N/A |
| Vermis_8 | N/A |
| Vermis_9 | N/A |
| Vermis_10 | N/A |

**Notes:** The left and right brain region labels are merged in the display, while cerebellar acronyms are excluded. Abbreviations used in the study, differing slightly from the original abbreviations by Tzourio-Mazoyer N (Tzourio-Mazoyer N et al., 2002).

**Table S2**

Demographic, clinical and cognitive characteristics of the participants

| Variable | HC (n = 48) | ANI (n = 47) | *P*-value |
| --- | --- | --- | --- |
| Age (years) | 0.742 ± 0.020 | 0.741 ± 0.022 | 0.844 a |
| Male, n (%) | 47 (97.9%) | 47 (100.0%) | 0.320 b |
| Education years (years) | 14.792 ±3.274 | 14.638 ±2.937 | 0.811 a |
| Duration of infection (months) | N/A | 53.064 ± 29.723 | N/A |
| Duration of treatment (months) | N/A | 49.957 ± 29.429 | N/A |
| Nadir CD4+ count (cells/μL) | N/A | 373.064 ± 201.815 | N/A |
| CD4+ count (cells/μL) | N/A | 565.426 ± 242.456 | N/A |
| CD4/CD8 radio | N/A | 0.680 ± 0.325 | N/A |
| TND, n (%) | N/A | 47 (100.0%) | N/A |
| Speed of information processing | 50.771 ± 7.096 | 41.532 ± 9.899 | < 0.001 a |
| Memory (learning and recall) | 49.797 ± 5.482 | 31.575 ± 7.750 | < 0.001 a |
| Attention/working memory | 51.844 ± 6.306 | 32.053 ± 9.018 | < 0.001 a |
| Fine motor skills | 51.750 ± 5.930 | 41.149 ± 9.818 | < 0.001 a |
| Verbal and language | 56.292 ± 6.737 | 46.596 ± 10.147 | < 0.001 a |

**Notes:** Statistical tests including: a*t*-test; bchi-square test. Abbreviations: TND, virus not detectable.

**Table S3**

Alterations in global functional network metrics are observed in persons with ANI

| Global network measures | HC group (n = 48) | PT group (n = 47) | *t*-value | *P*-value |
| --- | --- | --- | --- | --- |
| Cp | 0.260 ± 0.033 | 0.245 ± 0.013 | 2.921 | 0.004 |
| γ | 1.011 ± 0.071 | 1.006 ± 0.067 | 0.340 | 0.735 |
| λ | 0.498 ± 0.050 | 0.479 ± 0.007 | 2.687 | 0.009 |
| Lp | 0.848 ± 0.110 | 0.803 ± 0.018 | 2.761 | 0.007 |
| σ | 0.889 ± 0.072 | 0.918 ± 0.058 | -2.180 | 0.032 |
| Eg | 0.260 ± 0.017 | 0.267 ± 0.003 | -2.843 | 0.005 |
| Eloc | 0.344 ± 0.017 | 0.337 ± 0.007 | 2.903 | 0.005 |

**Notes:** Positive and negative *t*-values denote the directionality of the effects observed in the statistical analysis.

**Table S4**

Altered node attributes were observed in the functional brain networks of persons with ANI

| Brain regions | HC group (n = 48) | PT group (n = 47) | *t*-value | *P*-value |
| --- | --- | --- | --- | --- |
| Dc  ORBinf.L | 15.589 ± 3.617 | 13.189 ± 2.348 | 3.828 | 0.00023 |
| CAL.R | 11.244 ± 2.618 | 13.406 ± 2.458 | -4.148 | 0.00007 |
| SOG.L | 11.500 ± 2.787 | 13.392 ± 1.852 | -3.888 | 0.00019 |
| PCL.L | 12.579 ± 2.622 | 14.796 ± 2.445 | -4.261 | 0.00005 |
| PCL.R | 11.813 ± 2.386 | 14.050 ± 2.534 | -4.430 | 0.00003 |
| NCp |  |  |  |  |
| OLF.L | 0.258 ± 0.036 | 0.231 ± 0.035 | 3.689 | 0.00038 |
| PAL.L | 0.268 ± 0.054 | 0.233 ± 0.037 | 3.666 | 0.00041 |
| PAL.R | 0.275 ± 0.049 | 0.241 ± 0.037 | 3.672 | 0.00040 |
| Ne |  |  |  |  |
| CAL.L | 0.246 ± 0.021 | 0.262 ± 0.016 | 4.507 | 0.00002 |
| CAL.R | 0.242 ± 0.026 | 0.262 ± 0.015 | 4.465 | 0.00002 |
| LING.L | 0.254 ± 0.016 | 0.266 ± 0.015 | 3.695 | 0.00037 |
| LING.R | 0.253 ± 0.016 | 0.268 ± 0.015 | 4.578 | 0.00001 |
| SOG.L | 0.242 ± 0.033 | 0.265 ± 0.013 | 3.933 | 0.00016 |
| MOG.L | 0.247 ± 0.030 | 0.265 ± 0.013 | 3.759 | 0.00030 |
| IOG.L | 0.251 ± 0.017 | 0.263 ± 0.011 | 3.981 | 0.00014 |
| PCUN.L | 0.245 ± 0.033 | 0.265 ± 0.013 | 3.916 | 0.00017 |
| PCUN.R | 0.246 ± 0.033 | 0.268 ± 0.014 | 3.918 | 0.00017 |
| PCL.L | 0.247 ± 0.035 | 0.270 ± 0.016 | 4.131 | 0.00008 |
| PCL.R | 0.242 ± 0.034 | 0.267 ± 0.014 | 4.457 | 0.00002 |
| CRBL6.L | 0.270 ± 0.016 | 0.282 ± 0.014 | 3.864 | 0.00021 |
| NLe |  |  |  |  |
| CAU.L | 0.351 ± 0.021 | 0.332 ± 0.027 | 3.842 | 0.00022 |
| NLp |  |  |  |  |
| LING.L | 0.848 ± 0.073 | 0.793 ± 0.049 | 4.364 | 0.00003 |
| LING.R | 0.855 ± 0.074 | 0.789 ± 0.047 | 5.165 | 0.00001 |
| CRBL6.L | 0.800 ± 0.071 | 0.748 ± 0.043 | 4.386 | 0.00003 |

**Notes:** Positive and negative *t*-values denote the directionality of the effects observed in the statistical analysis.

**Figure S1**

Structural network global properties remain stable in persons with ANI.

**
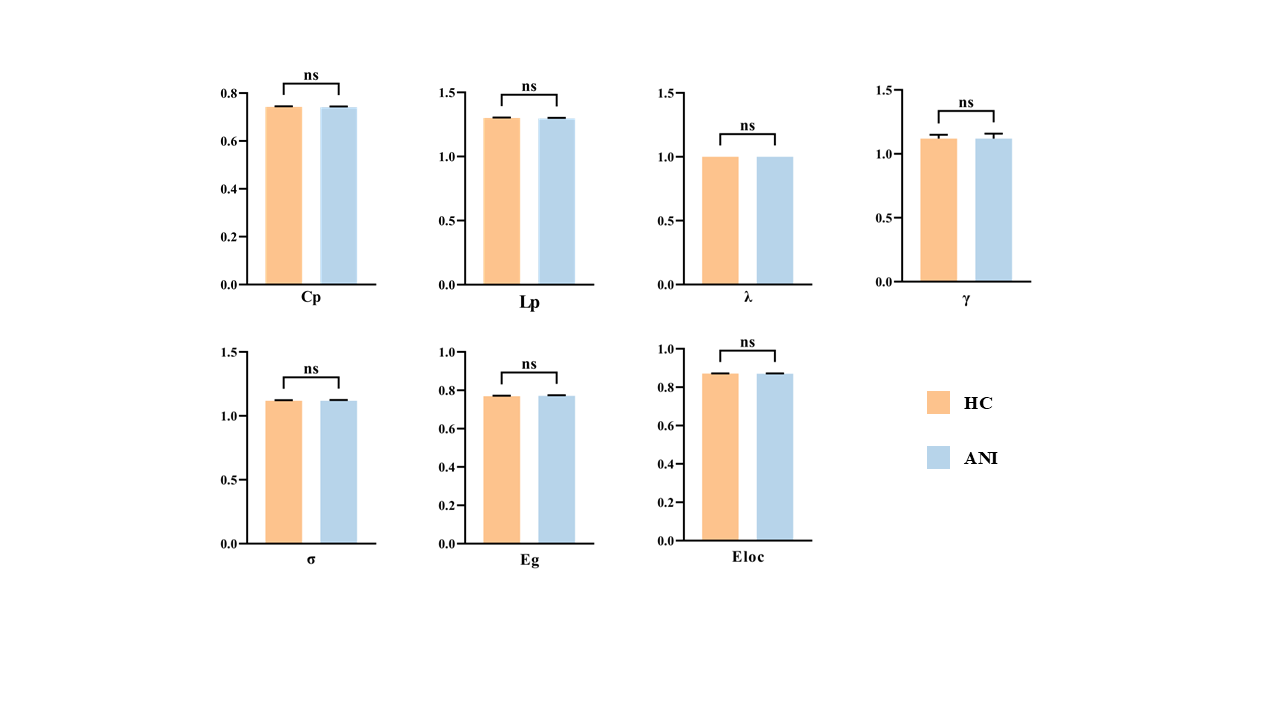
**

**Notes:** No significant differences were observed in the global properties of the structural connectivity network between HC and ANI groups. The bar chart illustrates the mean values of each metric across subjects, with error bars representing the standard error of the mean.

**Abbreviations:** ns, not significant.

**Table S5**

Structural network global properties remain stable in persons with ANI

| Global network measures | HC group (n=48) | PT group (n = 47) | *t*-value | *P*-value |
| --- | --- | --- | --- | --- |
| Cp | 0.742 ± 0.020 | 0.741 ± 0.022 | 0.197 | 0.844 |
| γ | 1.120 ± 0.031 | 1.120 ± 0.039 | -0.004 | 0.997 |
| λ | 1.001 ± 0.001 | 1.001 ± 0.001 | 1.510 | 0.134 |
| Lp | 1.300 ± 0.031 | 1.300 ± 0.035 | 0.485 | 0.629 |
| σ | 1.118 ± 0.030 | 1.118 ± 0.038 | -0.031 | 0.976 |
| Eg | 0.770 ± 0.018 | 0.772 ± 0.021 | -0.511 | 0.610 |
| Eloc | 0.871 ± 0.010 | 0.871 ± 0.011 | 0.197 | 0.845 |

**Notes:** Positive and negative t-values denote the directionality of the effects observed in the statistical analysis.

**Figure S2**

Disrupted structural connectivity and functional connectivity network coupling.

**
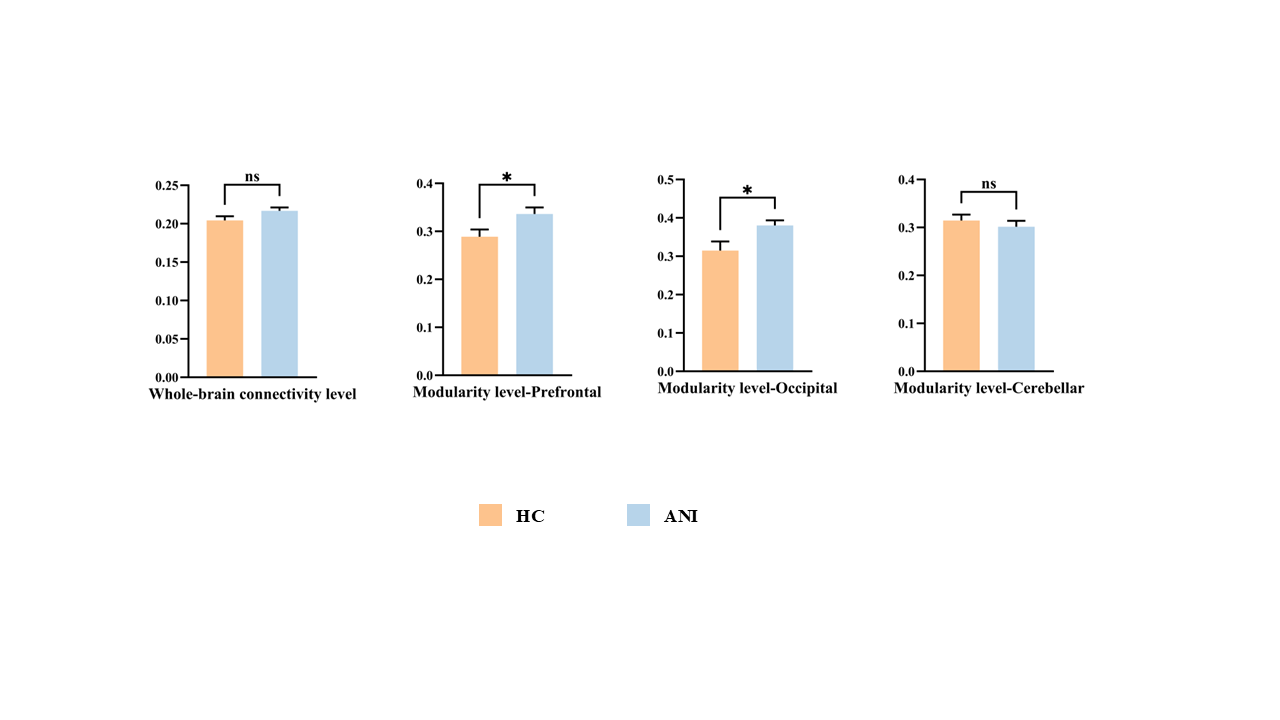
**

**Notes:** No changes in functional-structural connectivity coupling were observed at the whole-brain level in persons with ANI compared to HC. However, at the modular level, persons with ANI exhibited enhanced functional-structural coupling between the prefrontal and occipital networks. Statistical significance is denoted as follows: * *P* < 0.05.

**Abbreviations:** ns, not significant.

**Table S6**

Classification performance of single-indicator and combined models

| Features | Numbers | Youden index | AUC | Accuracy | Sensitivity | Specificity | Precision |
| --- | --- | --- | --- | --- | --- | --- | --- |
| Graph+FC | 29 | 0.9286 | 0.9617 | 0.9643 | 0.9286 | 1.0000 | 0.9630 |
| FC | 22 | 0.7143 | 0.8469 | 0.8214 | 0.7857 | 0.8571 | 0.8148 |
| Graph | 14 | 0.8571 | 0.9388 | 0.7857 | 0.7143 | 0.8571 | 0.7692 |

**Notes:** The Youden index is calculated as Sensitivity + Specificity – 1.

**Abbreviations:** AUC, area under the curve; FC, functional connectivity; Graph, graph-theoretical metrics.
